# Supplementary material
Source: PubMed Central journal article supplement (PMC10513015)
Supplement: pn9-2-e00035-s001.pdf [file pn9-2-e00035-s001.pdf]

## Supplementary Material.

Supplemental Table 1. Substance use during pregnancy and association with hypertensive disorders and pre-eclampsia among White participants. (N= 1007)

| Unadjusted                          | Hypertensive Disorders <sup>1</sup> |         | Pre-Eclampsia (Mild or Severe) |         |
|-------------------------------------|-------------------------------------|---------|--------------------------------|---------|
|                                     | Odds Ratio<br>(95% CI)              | P-value | Odds Ratio<br>(95% CI)         | P-value |
| Opioids <sup>2</sup>                | 1.13 (0.71, 1.79)                   | 0.60    | 0.89 (0.50, 1.59)              | 0.70    |
| Cocaine                             | 0.71 (0.19, 2.67)                   | 0.61    | [Failed to converge]           |         |
| Cannabis                            | 0.45 (0.13, 1.53)                   | 0.20    | [Failed to converge]           |         |
| Alcohol                             | 0.77 (0.44, 1.37)                   | 0.38    | 1.08 (0.54, 2.17)              | 0.82    |
| Tobacco                             | 0.77 (0.51, 1.17)                   | 0.22    | 0.49 (0.28, 0.85)              | 0.01    |
| Polysubstance score <sup>3</sup>    | 0.89 (0.72, 1.11)                   | 0.31    | 0.74 (0.56, 0.99)              | 0.04    |
| Polysubstance Category <sup>4</sup> |                                     |         |                                |         |
| Neither                             | REF                                 |         | REF                            |         |
| Smoking, no other substances        | 0.49 (0.28, 0.85)                   | 0.01    | 0.61 (0.30, 1.21)              | 0.16    |
| No smoking, other substances        | 0.62 (0.31, 1.24)                   | 0.17    | 1.10 (0.51, 2.39)              | 0.80    |
| Both                                | 0.71 (0.44, 1.15)                   | 0.16    | 0.49 (0.25, 0.95)              | 0.04    |
| Adjusted <sup>5</sup>               | Hypertensive Disorders <sup>1</sup> |         | Pre-Eclampsia (Mild or Severe) |         |
|                                     | Odds Ratio<br>(95% CI)              | P-value | Odds Ratio<br>(95% CI)         | P-value |
| Opioids                             | 1.34 (0.79, 2.25)                   | 0.27    | 1.27 (0.65, 2.46)              | 0.48    |
| Cocaine                             | 1.03 (0.26, 4.02)                   | 0.97    | [Failed to converge]           |         |
| Cannabis                            | 0.41 (0.11, 1.47)                   | 0.17    | [Failed to converge]           |         |
| Alcohol                             | 0.70 (0.39, 1.28)                   | 0.25    | 1.06 (0.52, 2.15)              | 0.87    |
| Tobacco                             | 0.93 (0.58, 1.49)                   | 0.76    | 0.60 (0.32, 1.11)              | 0.11    |
| Polysubstance score <sup>3</sup>    | 0.94 (0.74, 1.20)                   | 0.64    | 0.84 (0.61, 1.14)              | 0.26    |
| Polysubstance Category <sup>4</sup> |                                     |         |                                |         |
| Neither                             | REF                                 |         | REF                            |         |

|                              |                   |      |                      |      |
|------------------------------|-------------------|------|----------------------|------|
| Smoking, no other substances | 0.51 (0.27, 0.96) | 0.04 | 0.65 (0.31, 1.39)    | 0.27 |
| No smoking, other substances | 0.54 (0.26, 1.14) | 0.11 | 1.12 (0.51, 2.49) 27 | 0.78 |
| Both                         | 0.73 (0.42, 1.26) | 0.25 | 0.59 (0.27, 2.49)    | 0.17 |

<sup>1</sup>Hypertensive disorders include pre-eclampsia, eclampsia, gestational hypertension, and chronic hypertension

<sup>2</sup>Substance use effects were estimated controlling for concurrent substance use, each model included the 4 other substances used during pregnancy.

<sup>3</sup>The polysubstance score was defined as the count of substances used (reference was using 0 substances during pregnancy, ranging to using all 5 substances during pregnancy), controlling for only sociodemographic confounders.

<sup>4</sup>Polysubstance use categories were defined as: (1) using no substances during pregnancy (“neither”), (2) only smoking tobacco during pregnancy but no other substances, (3) using opioids, cocaine, or alcohol during pregnancy but no smoking, or (4) smoking and using either opioids, cocaine, or alcohol during pregnancy (“both”).

<sup>5</sup>Adjusted for maternal age, maternal pre-pregnancy BMI, yearly income, educational status, immigration history, parity, and sex of the child.

Supplementary Table 2. Polysubstance categories of smoking and other substance use and odds of hypertensive disorders in pregnancy.

| Smoking | Opioids  | Odds Ratio         | P-value | Odds Ratio        | P-value | Odds Ratio         | P-value |
|---------|----------|--------------------|---------|-------------------|---------|--------------------|---------|
|         |          | (95% CI)           |         | (95% CI)          |         | (95% CI)           |         |
| No      | No       | REF                |         | REF               |         | REF                |         |
| Yes     | No       | 0.70 (0.52, 0.94)  | 0.02    | 0.62 (0.42, 0.92) | 0.02    | 0.89 (0.59, 1.36)  | 0.59    |
| No      | Yes      | 4.92 (1.71, 14.16) | 0.003   | 1.91 (0.54, 6.81) | 0.32    | 8.21 (2.90, 23.24) | <0.001  |
| Yes     | Yes      | 1.49 (0.53, 4.1)   | 0.45    | 0.90 (0.21, 3.91) | 0.89    | 3.28 (1.08, 9.96)  | 0.04    |
| Smoking | Cannabis | Odds Ratio         | P-value | Odds Ratio        | P-value | Odds Ratio         | P-value |
|         |          | (95% CI)           |         | (95% CI)          |         | (95% CI)           |         |
| No      | No       | REF                |         | REF               |         | REF                |         |
| Yes     | No       | 0.66 (0.47, 0.94)  | 0.02    | 0.58 (0.37, 0.91) | 0.02    | 1.02 (0.66, 1.57)  | 0.94    |
| No      | Yes      | 0.91 (0.54, 1.51)  | 0.71    | 1.01 (0.56, 1.82) | 0.97    | 0.68 (0.30, 1.57)  | 0.37    |
| Yes     | Yes      | 0.91 (0.52, 1.59)  | 0.74    | 0.80 (0.40, 1.60) | 0.52    | 0.78 (0.34, 1.80)  | 0.56    |
| Smoking | Alcohol  | Odds Ratio         | P-value | Odds Ratio        | P-value | Odds Ratio         | P-value |
|         |          | (95% CI)           |         | (95% CI)          |         | (95% CI)           |         |
| No      | No       | REF                |         | REF               |         | REF                |         |
| Yes     | No       | 0.69 (0.48, 0.98)  | 0.04    | 0.51 (0.32, 0.83) | 0.006   | 0.89 (0.56, 1.41)  | 0.62    |
| No      | Yes      | 1.05 (0.75, 1.48)  | 0.77    | 1.32 (0.91, 1.92) | 0.15    | 1.07 (0.66, 1.73)  | 0.79    |
| Yes     | Yes      | 0.86 (0.49, 1.51)  | 0.59    | 1.09 (0.58, 2.04) | 0.80    | 1.25 (0.62, 2.52)  | 0.53    |

Supplementary Table 3. Logistic regression sensitivity analysis of spontaneous preterm birth, pre-eclampsia, and the composite outcome.

| Unadjusted                       | Spontaneous PTB <sup>1</sup> |         | Pre-eclampsia among no PTB |         | Composite Outcome      |         |
|----------------------------------|------------------------------|---------|----------------------------|---------|------------------------|---------|
|                                  | Odds Ratio<br>(95% CI)       | P-value | Odds Ratio<br>(95% CI)     | P-value | Odds Ratio<br>(95% CI) | P-value |
| Opioids                          | 1.83 (1.42, 2.36)            | <0.001  | 0.88 (0.46, 1.68)          | 0.70    | 1.43 (1.15, 1.79)      | 0.001   |
| Cocaine                          | 1.90 (1.18, 3.06)            | 0.008   | 0.33 (0.05, 2.37)          | 0.27    | 1.20 (0.78, 1.85)      | 0.41    |
| Cannabis                         | 1.68 (1.30, 2.18)            | <0.001  | 0.86 (0.45, 1.64)          | 0.65    | 1.26 (1.00, 1.58)      | 0.05    |
| Alcohol                          | 1.25 (1.03, 1.51)            | 0.02    | 1.47 (1.03, 2.09)          | 0.03    | 1.14 (0.97, 1.34)      | 0.10    |
| Tobacco                          | 1.75 (1.54, 2.00)            | <0.001  | 0.84 (0.62, 1.14)          | 0.26    | 1.30 (1.16, 1.45)      | <0.001  |
| Polysubstance score <sup>4</sup> | 1.34 (1.25, 1.45)            | <0.001  | 0.97 (0.82, 1.16)          | 0.78    | 1.15 (1.08, 1.23)      | <0.001  |
| Adjusted <sup>3</sup>            | Spontaneous PTB              |         | Pre-eclampsia among no PTB |         | Composite Outcome      |         |
|                                  | Odds Ratio<br>(95% CI)       | P-value | Odds Ratio<br>(95% CI)     | P-value | Odds Ratio<br>(95% CI) | P-value |
| Opioids                          | 1.41 (1.06, 1.89)            | 0.02    | 1.04 (0.51, 2.12)          | 0.92    | 1.32 (1.03, 1.70)      | 0.03    |
| Cocaine                          | 1.29 (0.79, 2.10)            | 0.30    | 0.35 (0.05, 2.59)          | 0.31    | 0.98 (0.62, 1.52)      | 0.91    |
| Cannabis                         | 1.32 (1.01, 1.73)            | 0.04    | 0.84 (0.43, 1.62)          | 0.60    | 1.07 (0.85, 1.36)      | 0.56    |
| Alcohol                          | 1.08 (0.89, 1.31)            | 0.45    | 1.48 (1.03, 2.14)          | 0.35    | 1.03 (0.88, 1.22)      | 0.69    |
| Tobacco                          | 1.43 (1.23, 1.67)            | <0.001  | 0.76 (0.54, 1.07)          | 0.12    | 1.11 (0.97, 1.27)      | 0.12    |
| Polysubstance score              | 1.20 (1.10, 1.31)            | <0.001  | 0.98 (0.80, 1.20)          | 0.84    | 1.07 (0.99, 1.15)      | 0.10    |

<sup>1</sup>Preterm birth (PTB).

<sup>2</sup>Composite outcome included either having spontaneous PTB or pre-eclampsia (including mild or severe).

<sup>3</sup>Adjusted for maternal age, maternal pre-pregnancy BMI, yearly income, educational status, immigration history, parity, and sex of the child.

<sup>4</sup>Polysubstance score was the number of substances used during pregnancy, and may be interpreted as the additive effect of using an additional substance during pregnancy.

Supplementary Table 4. Adjusted associations between substance use and stressful life events with hypertensive disorders, pre-eclampsia, and chronic hypertension among Black participants.

| Adjusted                             |                     | Hypertensive Disorders |         | Pre-Eclampsia (Mild or Severe) |         | Chronic HTN        |         |
|--------------------------------------|---------------------|------------------------|---------|--------------------------------|---------|--------------------|---------|
|                                      |                     | Odds Ratio             | P-value | Odds Ratio                     | P-value | Odds Ratio         | P-value |
|                                      |                     | (95% CI)               |         | (95% CI)                       |         | (95% CI)           |         |
| Substance use                        | Opioids             | 2.58 (1.22, 5.45)      | 0.01    | 1.34 (0.51, 3.53)              | 0.55    | 5.21 (2.28, 11.86) | <0.001  |
|                                      | Cocaine             | 0.70 (0.23, 2.09)      | 0.52    | 0.43 (1.02, 1.84)              | 0.26    | 0.23 (0.03, 1.77)  | 0.16    |
|                                      | Cannabis            | 0.94 (0.62, 1.44)      | 0.78    | 0.90 (0.56, 1.45)              | 0.68    | 0.89 (0.47, 1.68)  | 0.72    |
|                                      | Alcohol             | 0.93 (0.68, 1.28)      | 0.66    | 1.21 (0.86, 1.70)              | 0.28    | 1.05 (0.67, 1.65)  | 0.81    |
|                                      | Tobacco             | 0.67 (0.49, 0.93)      | 0.02    | 0.55 (0.37, 0.83)              | 0.004   | 0.89 (0.57, 1.39)  | 0.61    |
|                                      | Polysubstance score | 0.91 (0.77, 1.07)      | 0.24    | 0.90 (0.75, 1.08)              | 0.25    | 1.02 (0.82, 1.27)  | 0.84    |
| Combined smoking and other substance |                     |                        |         |                                |         |                    |         |
| Smoking                              | Opioids             |                        |         |                                |         |                    |         |
| No                                   | No                  | REF                    |         | REF                            |         | REF                |         |
| Yes                                  | No                  | 0.65 (0.46, 0.89)      | 0.008   | 0.54 (0.35, 0.81)              | 0.003   | 0.80 (0.50, 1.27)  | 0.34    |
| No                                   | Yes                 | 3.24 (1.09, 9.66)      | 0.03    | 1.49 (0.41, 5.40)              | 0.54    | 5.54 (1.80, 17.06) | 0.003   |
| Yes                                  | Yes                 | 1.85 (0.63, 5.40)      | 0.26    | 1.00 (0.23, 4.41)              | 1.00    | 4.55 (1.36, 15.20) | 0.02    |
| Smoking                              | Cannabis            |                        |         |                                |         |                    |         |
| No                                   | No                  | REF                    |         | REF                            |         | REF                |         |
| Yes                                  | No                  | 0.60 (0.41, 0.87)      | 0.007   | 0.49 (0.30, 0.80)              | 0.004   | 0.89 (0.54, 1.45)  | 0.63    |
| No                                   | Yes                 | 0.84 (0.49, 1.46)      | 0.55    | 0.90 (0.49, 1.67)              | 0.75    | 0.89 (0.36, 1.45)  | 0.76    |
| Yes                                  | Yes                 | 0.92 (0.41, 1.65)      | 0.77    | 0.74 (0.36, 1.51)              | 0.41    | 0.88 (0.36, 2.11)  | 0.77    |
| Smoking                              | Alcohol             |                        |         |                                |         |                    |         |
| No                                   | No                  | REF                    |         | REF                            |         | REF                |         |
| Yes                                  | No                  | 0.64 (0.43, 0.93)      | 0.02    | 0.46 (0.28, 0.76)              | 0.002   | 0.83 (0.50, 1.39)  | 0.48    |
| No                                   | Yes                 | 0.92 (0.64, 1.32)      | 0.65    | 1.20 (0.81, 1.76)              | 0.36    | 1.01 (0.60, 1.70)  | 0.98    |
| Yes                                  | Yes                 | 7.75 (0.42, 1.42)      | 0.41    | 0.91 (0.47, 1.75)              | 0.36    | 1.08 (0.50, 2.33)  | 0.85    |
| Stressful life events                | General stress      | 1.20 (1.05, 1.37)      | 0.006   | 1.34 (1.14, 1.57)              | <0.001  | 1.31 (1.08, 1.59)  | 0.006   |
|                                      | Index               | 1.15 (1.02, 1.29)      | 0.02    | 1.24 (1.08, 1.43)              | 0.002   | 1.23 (1.04, 1.47)  | 0.02    |

Stress score      1.03 (1.00, 1.06)      0.04      1.05 (1.02, 1.09)      0.003      1.01 (0.98, 1.06)      0.35

Adjusted for parity, maternal place of birth, maternal age, maternal education level, maternal income quartile, maternal pre-pregnancy BMI, child sex and child birth year (for temporal trends).

Note: The reference for substance use is simply not using the substance. Women may be using other substances in the reference group though.

Supplementary Table 5. Adjusted associations between substance use and stressful life events with hypertensive disorders, pre-eclampsia, and chronic hypertension among Hispanic participants.

| Adjusted                             |                     | Hypertensive Disorders |         | Pre-Eclampsia (Mild or Severe) |         | Chronic HTN         |         |
|--------------------------------------|---------------------|------------------------|---------|--------------------------------|---------|---------------------|---------|
|                                      |                     | Odds Ratio             | P-value | Odds Ratio                     | P-value | Odds Ratio          | P-value |
|                                      |                     | (95% CI)               |         | (95% CI)                       |         | (95% CI)            |         |
| Substance use                        | Opioids             | 0.65 (0.17, 2.44)      | 0.52    | 0.46 (0.11, 2.00)              | 0.30    | 1.14 (0.24, 5.46)   | 0.87    |
|                                      | Cocaine             | 0.68 (0.10, 4.45)      | 0.69    | 0.60 (0.08, 4.72)              | 0.63    | 1.74 (0.20, 1.51)   | 0.61    |
|                                      | Cannabis            | 2.41 (1.00, 5.84)      | 0.05    | 2.32 (0.93, 5.82)              | 0.07    | 15.78 (5.45, 45.66) | <0.001  |
|                                      | Alcohol             | 0.74 (0.48, 1.46)      | 0.53    | 0.91 (0.50, 1.66)              | 0.76    | 1.12 (0.43, 2.94)   | 0.82    |
|                                      | Tobacco             | 0.91 (0.47, 1.77)      | 0.78    | 0.78 (0.38, 1.58)              | 0.49    | 2.57 (1.07, 6.15)   | 0.03    |
|                                      | Polysubstance score | 0.97 (0.71, 1.32)      | 0.84    | 0.94 (0.68, 1.28)              | 0.69    | 1.60 (1.10, 2.32)   | 0.01    |
| Combined smoking and other substance |                     |                        |         |                                |         |                     |         |
| Smoking                              | Opioids             |                        |         |                                |         |                     |         |
| No                                   | No                  | REF                    |         | REF                            |         | REF                 |         |
| Yes                                  | No                  | 0.95 (0.47, 1.95)      | 0.90    | 0.87 (0.40, 1.88)              | 0.72    | 2.92 (1.15, 7.40)   | 0.02    |
| No                                   | Yes                 | [X]                    |         | [X]                            |         | [X]                 |         |
| Yes                                  | Yes                 | 0.75 (0.19, 2.91)      | 0.67    | 0.41 (0.12, 2.27)              | 0.38    | 1.66 (0.33, 8.25)   | 0.54    |
| Smoking                              | Cannabis            |                        |         |                                |         |                     |         |
| No                                   | No                  | REF                    |         | REF                            |         | REF                 |         |
| Yes                                  | No                  | 0.58 (0.25, 1.37)      | 0.21    | 0.44 (0.17, 1.14)              | 0.09    | 0.85 (0.24, 3.06)   | 0.80    |
| No                                   | Yes                 | 0.74 (0.09, 5.80)      | 0.77    | 0.79 (0.10, 6.25)              | 0.82    | [X]                 |         |
| Yes                                  | Yes                 | 3.61 (1.33, 9.75)      | 0.01    | 3.19 (1.13, 9.01)              | 0.03    | 27.51 (8.68, 87.20) | <0.001  |
| Smoking                              | Alcohol             |                        |         |                                |         |                     |         |
| No                                   | No                  | REF                    |         | REF                            |         | REF                 |         |
| Yes                                  | No                  | 0.75 (0.34, 1.63)      | 0.46    | 0.55 (0.23, 1.32)              | 0.18    | 2.87 (1.15, 7.17)   | 0.02    |
| No                                   | Yes                 | 0.70 (0.38, 1.28)      | 0.25    | 0.71 (0.35, 1.45)              | 0.35    | 1.21 (0.41, 3.56)   | 0.73    |
| Yes                                  | Yes                 | 1.68 (0.53, 5.32)      | 0.37    | 1.94 (0.63, 6.02)              | 0.25    | 1.50 (0.18, 12.59)  | 0.71    |
| Stressful life events                | General stress      | 1.01 (0.82, 1.25)      | 0.90    | 1.16 (0.94, 1.46)              | 0.20    | 1.30 (0.88, 1.89)   | 0.18    |
|                                      | Index               | 1.09 (0.90, 1.32)      | 0.37    | 1.20 (0.98, 1.47)              | 0.08    | 1.55 (1.11, 2.18)   | 0.01    |

Stress score      1.01 (0.98, 1.05)      0.51      0.99 (0.95, 1.04)      0.69      1.08 (1.00, 1.16)      0.05

Adjusted for parity, maternal place of birth, maternal age, maternal education level, maternal income quartile, maternal pre-pregnancy BMI, child sex and child birth year (for temporal trends).

Note: The reference for substance use is simply not using the substance. Women may be using other substances in the reference group though.

Supplementary Table 6. Sequential adjustment for covariates and the impact on the estimated effect of smoking during pregnancy and pre-eclampsia.

| Sex of Child | Maternal Education | Maternal Marital Status | Maternal Place of Birth | Parity | Yearly Income | Body Mass Index | Maternal Age | Smoking estimate <sup>1</sup>  |
|--------------|--------------------|-------------------------|-------------------------|--------|---------------|-----------------|--------------|--------------------------------|
|              |                    |                         |                         |        |               |                 |              | 0.93 (0.74, 1.16) <sup>2</sup> |
| X            |                    |                         |                         |        |               |                 |              | 0.89 (0.70, 1.11)              |
|              | X                  |                         |                         |        |               |                 |              | 0.89 (0.71, 1.13)              |
|              |                    | X                       |                         |        |               |                 |              | 0.89 (0.70, 1.12)              |
|              |                    |                         | X                       |        |               |                 |              | 0.77 (0.60, 1.00)              |
|              |                    |                         |                         | X      |               |                 |              | 0.90 (0.72, 1.14)              |
|              |                    |                         |                         |        | X             |                 |              | 0.88 (0.70, 1.11)              |
|              |                    |                         |                         |        |               | X               |              | 0.84 (0.67, 1.06)              |
|              |                    |                         |                         |        |               |                 | X            | 0.93 (0.74, 1.17)              |

<sup>1</sup>Competing risk regression estimate using Fine-Gray subdistribution model to adjust for spontaneous preterm birth, using gestational age as the time metric.

<sup>2</sup>Unadjusted estimate.

Supplementary Table 7. Assessment of competing risk of preterm birth for hypertensive disorders among all participants.

| Unadjusted                       | PTB <sup>1</sup> among no Hypertensive Disorders |         | Hypertensive Disorders among no PTB |         | Competing Risk Regression <sup>2</sup> for Hypertensive Disorders |         |
|----------------------------------|--------------------------------------------------|---------|-------------------------------------|---------|-------------------------------------------------------------------|---------|
|                                  | Hazards Ratio<br>(95% CI)                        | P-value | Hazards Ratio<br>(95% CI)           | P-value | Hazards Ratio<br>(95% CI)                                         | P-value |
| Opioids                          | 2.67 (2.19, 3.25)                                | <0.001  | 1.76 (1.17, 2.65)                   | 0.008   | 1.23 (0.87, 1.73)                                                 | 0.25    |
| Cocaine                          | 1.33 (0.93, 1.92)                                | 0.12    | 0.75 (0.28, 1.98)                   | 0.56    | 0.94 (0.49, 1.80)                                                 | 0.84    |
| Cannabis                         | 1.74 (1.41, 2.15)                                | <0.001  | 1.25 (0.84, 1.88)                   | 0.28    | 1.05 (0.73, 1.51)                                                 | 0.79    |
| Alcohol                          | 1.34 (1.14, 1.56)                                | <0.001  | 1.05 (0.81, 1.36)                   | 0.70    | 0.97 (0.76, 1.25)                                                 | 0.83    |
| Tobacco                          | 1.45 (1.28, 1.65)                                | <0.001  | 0.83 (0.65, 1.06)                   | 0.14    | 0.73 (0.57, 0.92)                                                 | 0.007   |
| Polysubstance score <sup>3</sup> | 1.30 (1.22, 1.37)                                | <0.001  | 1.02 (0.90, 1.15)                   | 0.76    | 0.94 (0.84, 1.06)                                                 | 0.31    |
| Adjusted <sup>4</sup>            | PTB <sup>1</sup> among no Hypertensive Disorders |         | Hypertensive Disorders among no PTB |         | Competing Risk Regression <sup>2</sup> for Hypertensive Disorders |         |
|                                  | Hazards Ratio<br>(95% CI)                        | P-value | Hazards Ratio<br>(95% CI)           | P-value | Hazards Ratio<br>(95% CI)                                         | P-value |
| Opioids                          | 2.24 (1.82, 2.75)                                | <0.001  | 1.95 (1.28, 2.96)                   | 0.002   | 1.40 (0.98, 2.01)                                                 | 0.07    |
| Cocaine                          | 1.00 (0.69, 1.45)                                | 1.00    | 0.77 (0.29, 2.08)                   | 0.61    | 1.08 (0.55, 2.12)                                                 | 0.82    |
| Cannabis                         | 1.65 (1.33, 2.04)                                | <0.001  | 1.39 (0.91, 2.12)                   | 0.12    | 1.22 (0.85, 1.76)                                                 | 0.29    |
| Alcohol                          | 1.22 (1.04, 1.43)                                | 0.02    | 0.96 (0.74, 1.26)                   | 0.77    | 0.97 (0.76, 1.25)                                                 | 0.84    |
| Tobacco                          | 1.30 (1.13, 1.49)                                | <0.001  | 0.81 (0.62, 1.05)                   | 0.14    | 0.77 (0.61, 0.99)                                                 | 0.04    |
| Polysubstance score              | 1.24 (1.16, 1.32)                                | <0.001  | 1.01 (0.88, 1.16)                   | 0.84    | 0.99 (0.87, 1.12)                                                 | 0.84    |

<sup>1</sup>PTB: Preterm Birth

<sup>2</sup>Fine-Gray subdistribution hazards model with spontaneous preterm birth as the competing risk, and pre-eclampsia (mild, moderate, or severe) as the main outcome of interest.

<sup>3</sup>Polysubstance score was an unweighted sum of the number of substances used in order to estimate the aggregate burden of substance use in pregnancy.

<sup>4</sup>Adjusted for maternal age, maternal pre-pregnancy BMI, yearly income, educational status, immigration history, parity, and sex of the child.

Supplemental Table 8. E-Values for statistically significant adjusted odds ratio findings among Black participants, and among White participants.

| E-Values of Significant Adjusted Model Estimates | Black participants                    | White participants                    |
|--------------------------------------------------|---------------------------------------|---------------------------------------|
|                                                  | Point Estimate<br>(Lower/Upper limit) | Point Estimate<br>(Lower/Upper limit) |
| Opioids <sup>2</sup>                             | 5.93 (2.01)                           | Not sig                               |
| Cocaine                                          | Not sig                               | Not sig                               |
| Cannabis                                         | Not sig                               | Not sig                               |
| Alcohol                                          | Not sig                               | Not sig                               |
| Tobacco                                          | Not sig                               | 2.30 (1.21)                           |
| Polysubstance score <sup>3</sup>                 | 1.67 (1.00)                           | Not sig                               |
| Polysubstance Category <sup>4</sup>              |                                       |                                       |
| Neither                                          | REF                                   | REF                                   |
| Smoking, no other substances                     | Not sig                               | Not sig                               |
| No smoking, other substances                     | Not sig                               | Not sig                               |
| Both                                             | 2.66 (1.36)                           | 2.72 (1.25)                           |

Note: E-Values were only generated for statistically significant estimates of effect among models adjusted for maternal age, maternal pre-pregnancy BMI, yearly income, educational status, immigration history, parity, and sex of the child. Estimates among the Hispanic participant subcohort were not statistically significant and therefore not included in this analysis.

Supplemental Table 9. E-Values for statistically significant adjusted hazards ratios of competing risk of preterm birth for pre-eclampsia among all participants.

| E-Values of Significant Adjusted Model Estimates | PTB <sup>1</sup> among no Pre-Eclampsia | Pre-eclampsia among no PTB         | Competing Risk Regression <sup>2</sup> for pre-eclampsia |
|--------------------------------------------------|-----------------------------------------|------------------------------------|----------------------------------------------------------|
|                                                  | Point Estimate (Lower/Upper limit)      | Point Estimate (Lower/Upper limit) | Point Estimate (Lower/Upper limit)                       |
| Opioids                                          | 2.13 (1.11)                             | 2.77 (1.31)                        | Not sig                                                  |
| Cocaine                                          | Not sig                                 | Not sig                            | Not sig                                                  |
| Cannabis                                         | Not sig                                 | Not sig                            | Not sig                                                  |
| Alcohol                                          | Not sig                                 | Not sig                            | Not sig                                                  |
| Tobacco                                          | 1.90 (1.37)                             | Not sig                            | Not sig                                                  |
| Polysubstance score                              | 1.64 (1.37)                             | Not sig                            | 1.53 (1.21)                                              |

Note: E-Values were only generated for statistically significant estimates of effect among models adjusted for maternal age, maternal pre-pregnancy BMI, yearly income, educational status, immigration history, parity, and sex of the child.

| Unadjusted                       | PTB <sup>1</sup> among no Hypertensive Disorders |         | Hypertensive Disorders among no PTB |         | Competing Risk Regression <sup>2</sup> for Hypertensive Disorders |         |
|----------------------------------|--------------------------------------------------|---------|-------------------------------------|---------|-------------------------------------------------------------------|---------|
|                                  | Hazards Ratio<br>(95% CI)                        | P-value | Hazards Ratio<br>(95% CI)           | P-value | Hazards Ratio<br>(95% CI)                                         | P-value |
| Opioids                          | 2.67 (2.19, 3.25)                                | <0.001  | 1.76 (1.17, 2.65)                   | 0.008   | 1.23 (0.87, 1.73)                                                 | 0.25    |
| Cocaine                          | 1.33 (0.93, 1.92)                                | 0.12    | 0.75 (0.28, 1.98)                   | 0.56    | 0.94 (0.49, 1.80)                                                 | 0.84    |
| Cannabis                         | 1.74 (1.41, 2.15)                                | <0.001  | 1.25 (0.84, 1.88)                   | 0.28    | 1.05 (0.73, 1.51)                                                 | 0.79    |
| Alcohol                          | 1.34 (1.14, 1.56)                                | <0.001  | 1.05 (0.81, 1.36)                   | 0.70    | 0.97 (0.76, 1.25)                                                 | 0.83    |
| Tobacco                          | 1.45 (1.28, 1.65)                                | <0.001  | 0.83 (0.65, 1.06)                   | 0.14    | 0.73 (0.57, 0.92)                                                 | 0.007   |
| Polysubstance score <sup>3</sup> | 1.30 (1.22, 1.37)                                | <0.001  | 1.02 (0.90, 1.15)                   | 0.76    | 0.94 (0.84, 1.06)                                                 | 0.31    |
| Adjusted <sup>4</sup>            | PTB <sup>1</sup> among no Hypertensive Disorders |         | Hypertensive Disorders among no PTB |         | Competing Risk Regression <sup>2</sup> for Hypertensive Disorders |         |
|                                  | Hazards Ratio<br>(95% CI)                        | P-value | Hazards Ratio<br>(95% CI)           | P-value | Hazards Ratio<br>(95% CI)                                         | P-value |
| Opioids                          | 2.24 (1.82, 2.75)                                | <0.001  | 1.95 (1.28, 2.96)                   | 0.002   | 1.40 (0.98, 2.01)                                                 | 0.07    |
| Cocaine                          | 1.00 (0.69, 1.45)                                | 1.00    | 0.77 (0.29, 2.08)                   | 0.61    | 1.08 (0.55, 2.12)                                                 | 0.82    |
| Cannabis                         | 1.65 (1.33, 2.04)                                | <0.001  | 1.39 (0.91, 2.12)                   | 0.12    | 1.22 (0.85, 1.76)                                                 | 0.29    |
| Alcohol                          | 1.22 (1.04, 1.43)                                | 0.02    | 0.96 (0.74, 1.26)                   | 0.77    | 0.97 (0.76, 1.25)                                                 | 0.84    |
| Tobacco                          | 1.30 (1.13, 1.49)                                | <0.001  | 0.81 (0.62, 1.05)                   | 0.14    | 0.77 (0.61, 0.99)                                                 | 0.04    |
| Polysubstance score              | 1.24 (1.16, 1.32)                                | <0.001  | 1.01 (0.88, 1.16)                   | 0.84    | 0.99 (0.87, 1.12)                                                 | 0.84    |
